# Supplementary material
Source: PubMed Central journal article supplement (PMC1766442)

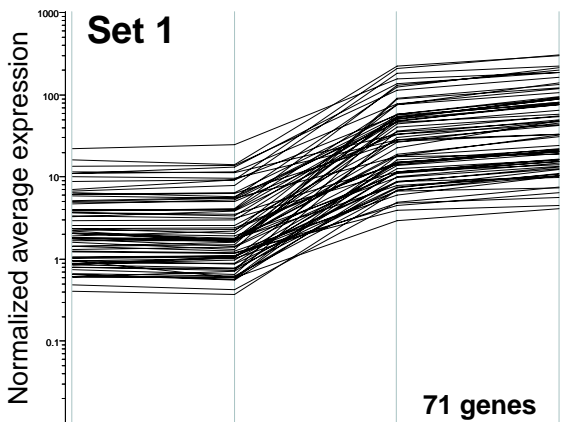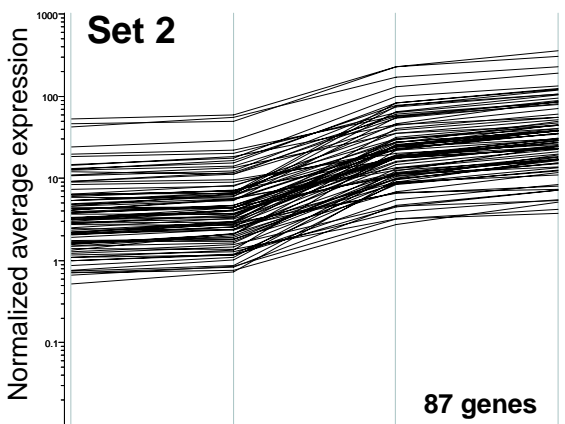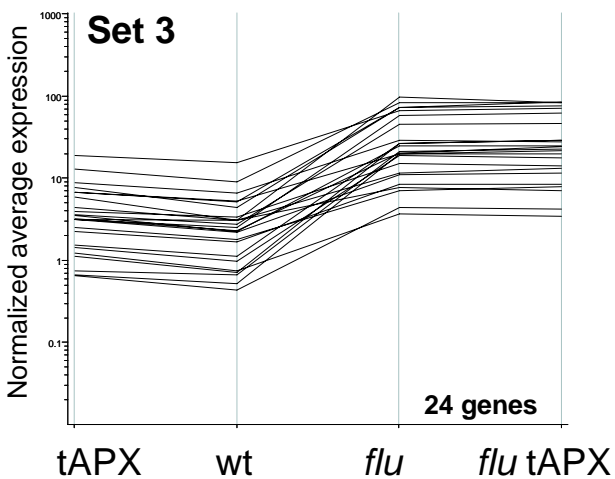

Supplement: pnas_0609063103_1.pdf [file pnas_0609063103_1.pdf]
